# Supplementary material for: Dichotomic Potency of IFNγ Licensed Allogeneic Mesenchymal Stromal Cells in Animal Models of Acute Radiation Syndrome and Graft Versus Host Disease
Source: PubMed Central journal article supplement (PMC8352793; doi:10.3389/fimmu.2021.708950), 2021-07-26
Supplement: Image_1.pdf [file Image_1.pdf]

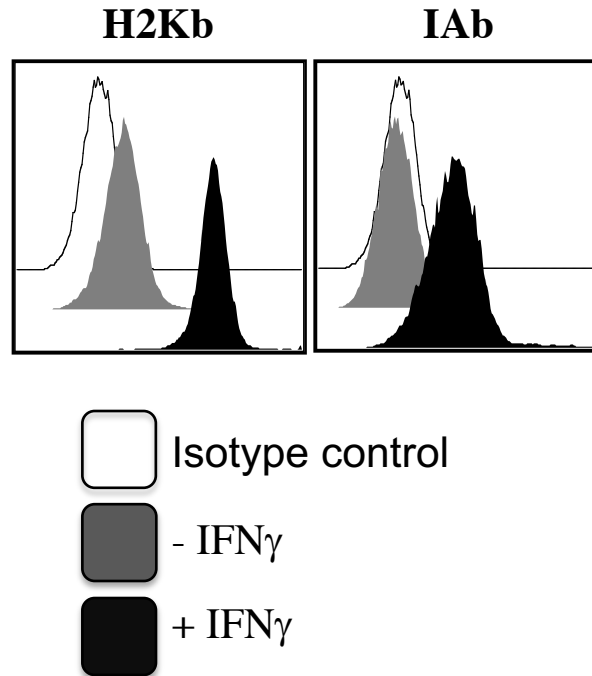

**Figure S1. MHC class I and MHC Class II expression on IFN $\gamma$  licensed MSCs.** C57BL/6 MSCs were stimulated with IFN $\gamma$  for 48 hours and subsequently surface expression of MHC class I(H2K) and MHC class II (Iab) was measured in flow cytometry.
