# Supplementary material for: Dichotomic Potency of IFNγ Licensed Allogeneic Mesenchymal Stromal Cells in Animal Models of Acute Radiation Syndrome and Graft Versus Host Disease
Source: PubMed Central journal article supplement (PMC8352793; doi:10.3389/fimmu.2021.708950), 2021-07-26
Supplement: Image_2.pdf [file Image_2.pdf]

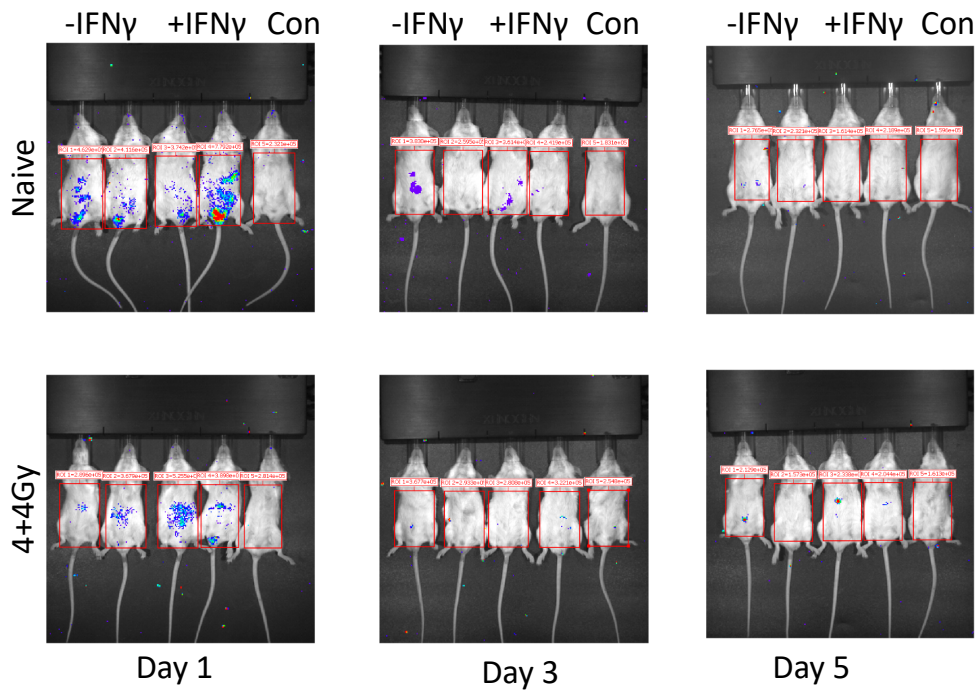

**Figure S2. Bioluminescence imaging of intraperitoneally delivered IFN $\gamma$  licensed allogeneic MSCs.** Balb/c animals were subjected to 4+4Gy irradiation. 24 hours later, IFN $\gamma$  (20ng/ml for 48 hours) licensed luciferase+ C57BL/6 MSCs were injected intraperitoneally with a dose of  $10^7$  cells/animal. Bioluminescence imaging was performed on days 1, 3 and 5 post injection.
